# Supplementary material for: Impact of somatic mutations on clinical and pathologic outcomes in borderline resectable and locally advanced pancreatic cancer treated with neoadjuvant chemotherapy and stereotactic body radiotherapy followed by surgical resection
Source: PubMed Central journal article supplement — Radiat Oncol J. 2021 Dec 17;39(4):304–14. doi: 10.3857/roj.2021.00815 (PMC8743453; doi:10.3857/roj.2021.00815), 2021-12-17
Supplement: roj-2021-00815-suppl.pdf [file roj-2021-00815-suppl.pdf]

## Supplementary Materials

**Table S1.** Univariate and multivariable analyses of local progression-free survival

| Variable                                       | Univariate analysis     |         | Multivariate analysis |         |
|------------------------------------------------|-------------------------|---------|-----------------------|---------|
|                                                | HR (95% CI)             | p-value | HR (95% CI)           | p-value |
| Sex (male vs. female)                          | 1.90 (0.72–5.04)        | 0.20    |                       |         |
| Age ( $\geq 65$ vs. $< 65$ yr)                 | 1.22 (0.48–3.10)        | 0.68    |                       |         |
| KPS (90–100 vs. 70–80)                         | 0.75 (0.17–3.29)        | 0.71    |                       |         |
| Disease extent (BRPC vs. LAPC)                 | 0.98 (0.39–2.47)        | 0.97    |                       |         |
| Tumor location (head vs. other)                | 1.67 (0.66–4.24)        | 0.28    |                       |         |
| Tumor size ( $\geq 3.6$ vs. $< 3.6$ cm)        | 0.63 (0.26–1.57)        | 0.32    |                       |         |
| Baseline CA19-9 ( $> 148$ vs. $\leq 148$ U/mL) | 3.93 (0.79–19.53)       | 0.095   |                       |         |
| Chemo duration ( $> 4$ vs. $\leq 4$ mo)        | 1.01 (0.39–2.57)        | 0.99    |                       |         |
| PNI (absent vs. present)                       | 0.53 (0.18–1.60)        | 0.26    |                       |         |
| LVI (absent vs. present)                       | 0.49 (0.20–1.25)        | 0.14    |                       |         |
| Adjuvant/maintenance chemotherapy (yes vs. no) | 0.41 (0.14–1.21)        | 0.11    |                       |         |
| <i>KRAS</i> (mutant vs. wild type)             | 23.30 (0.019–28,351.67) | 0.39    |                       |         |
| <i>TP53</i> (mutant vs. wild type)             | 0.79 (0.32–1.95)        | 0.61    |                       |         |
| <i>NOTCH1/2</i> (mutant vs. wild type)         | 1.87 (0.65–5.33)        | 0.24    |                       |         |
| <i>CDKN2A</i> (mutant vs. wild type)           | 0.99 (0.33–2.99)        | 0.99    |                       |         |

KPS, Karnofsky Performance Score; BRPC, borderline resectable pancreatic cancer; LAPC, locally advanced pancreatic cancer; CA19-9, cancer antigen 19-9; PNI, perineural invasion; LVI, lymphovascular invasion; HR, hazard ratio; CI, confidence interval.
